# Supplementary material
Source: publisher figshare collection journal article supplement (https://wiley.figshare.com/articles/dataset/_/9735866)
Supplement: Supplementary file 1 [file 1]

# Proteins required for vacuolar function are targets of lysine polyphosphorylation in yeast

Liam McCarthy<sup>1,2,3</sup>, Amanda Bentley-DeSousa<sup>1,2,3</sup>, Alix Denoncourt<sup>1,2</sup>, Yi-Chieh Tseng<sup>1,2</sup>,  
Matthew Gabriel<sup>1,2</sup>, and Michael Downey<sup>1,2,4</sup>

1. Department of Cellular and Molecular Medicine, University of Ottawa, Ottawa, Ontario, Canada, K1H 8M5

2. Ottawa Institute of Systems Biology, University of Ottawa, Ottawa, Ontario, Canada, K1H 8M5

3. Contributed equally to this work

4. Corresponding author: mdowne2@uottawa.ca

**Running Title:** New polyphosphorylation targets in yeast

**ABSTRACT:**

Polyphosphates (polyP) are long chains of inorganic phosphates that can be attached to lysine residues of target proteins as a non-enzymatic post-translational modification. This modification, termed polyphosphorylation, may be particularly prevalent in bacterial and fungal species that synthesize large quantities of polyP. In this study, we evaluated the polyphosphorylation status of over 200 candidate targets in *S. cerevisiae*. We report 8 new polyphosphorylated proteins that interact genetically and physically with previous targets implicated in ribosome biogenesis. The expanded target network includes vacuolar proteins Prb1 and Apl5, whose modification with polyP suggests a model for feedback regulation of polyP synthesis, while raising questions regarding the location of polyphosphorylation *in vivo*.

## **INTRODUCTION:**

Polyphosphate (polyP) is a polymer of inorganic phosphate moieties joined together in linear chains ranging from 3-1000s of residues in length. Evidence suggests that these chains exist in all cells, although their length and concentration vary widely. PolyP is particularly abundant in the budding yeast *S. cerevisiae*, comprising upwards of 10 % of the dry weight of the cell and reaching internal concentrations of over 200 mM in terms of individual phosphate units [1, 2]. Most of the polyP in yeast is stored in the vacuole following synthesis by the vacuolar membrane-bound VTC complex [3]. Overall chain length is controlled by exo- and endopolyphosphatases Ddp1, Ppn1, Ppn2, and Ppx1 [4]. In addition to its role in ion homeostasis and phosphate metabolism [5, 6], Azevedo *et al.* showed that polyP chains can be non-covalently added to lysine residues as a post-translational modification (PTM) [7]. They characterized this modification on proteins Nsr1 and Top1, providing evidence that polyP chains can regulate protein interactions and topoisomerase activity of purified Top1 *in vitro*, as well as the localization of Nrs1 and Top1 *in vivo*. Polyphosphorylation is non-enzymatic and occurs in poly-acidic serine and lysine rich (PASK) motifs [7, 8]. While the sequence requirements for polyP addition are unclear, lysine residues appear to be the modified site [7, 9, 10]. Consistent with this, mutation of lysine residues within predicted PASK motifs to arginine prevents polyphosphorylation of Nsr1, Top1, and Rpa34 [7, 9]. Polyphosphorylation causes dramatic electrophoretic shifts when protein extracts are run on denaturing Bis-Tris NuPAGE gels, but this same shift does not occur with traditional SDS-PAGE gels [7, 9]. The underlying reasons for this difference are not completely clear, although it could be related to the use of TEMED in the polymerization of SDS-PAGE gels [9].

Recently, we reported the identification of an additional 15 polyphosphorylation targets in yeast, including a conserved network implicated in ribosome biogenesis [9]. Many of the PASK motifs in these proteins are contained within intrinsically disordered regions that appear to be under evolutionary selection [11]. Based on enrichment in ribosome-related functions, we uncovered a novel function for *VTC4*, encoding the catalytic subunit of the VTC complex [12], in polysome assembly [9]. We also demonstrated that 6 human proteins, including homologs of our novel yeast targets, could be polyphosphorylated following the ectopic expression of *E. coli* PPK, the bacterial polyP polymerase, in HEK293T cells [9]. Subsequent studies using protein microarrays identified an additional 8 human proteins as targets, in addition to 5 proteins that appear to bind polyP chains non-covalently [13]. Altogether, work from our group and others suggests that lysine polyphosphorylation has the capacity to be a global protein modifier, akin to other lysine-based modifications such as acetylation or ubiquitylation [8, 14].

Our previous strategy to identify targets of lysine polyphosphorylation in yeast took advantage of a set of strains wherein each open reading frame is expressed as a fusion with the GFP epitope [15]. Candidate fusions from this set were crossed into a wild-type or *vtc4Δ* mutant background prior to analysis by NuPAGE and immunoblotting with an antibody against GFP. In this assay, a *VTC4*-dependent electrophoretic shift signals a candidate polyphosphorylated protein. In our previous work [9], we prioritized 90 targets from 427 proteins containing putative PASK motifs, defined by a sliding window of 20 amino acids with 75 % D, E, S or K amino acids with at least 1 K. This set of 90 proteins was enriched for multiple or long PASK motifs containing many lysine residues. In an attempt to further define the landscape of polyphosphorylation in *S. cerevisiae*, we have now screened the remainder of the candidates present in this GFP collection (See Materials and Methods) using a similar strategy.

## **RESULTS & DISCUSSION:**

Using our previously defined screening approach, we have now uncovered an additional 8 candidate targets. As observed in our previous work, the shifts conferred by polyP (i.e. in the presence of a functional *VTC4* gene) are dramatic and quantitative, with the whole population of target proteins being affected (**Figure 1**). We attribute this ‘all or nothing’ pattern to the high concentration of polyP in cells and in extracts following cell lysis, which could be quantitatively modifying proteins *in vitro*. *In vivo*, polyphosphorylation of any given target may be sub-stoichiometric. As we previously found for other targets [9], polyP-induced shifts collapsed when samples were analyzed via SDS-PAGE instead of NuPAGE (**Supporting Figure 1**). New polyphosphorylated targets uncovered in our screen include homologs of proteins implicated in human disease (**Figure 1, see below**). Despite the identification of proteins predicted to function in diverse processes, new targets display extensive physical and genetic interactions with previously identified polyphosphorylated proteins (**Figure 2**). Heh2 is an inner nuclear membrane protein involved in ensuring the quality control of nuclear pore complexes [16]. Ygr237c and Kel3 are uncharacterized proteins with diverse physical and genetic interactions and putative cytoplasmic localization [17]. Itc1 is a member of the Itc1-Isw2 chromatin remodeling complex involved in meiotic gene repression [18]. Nop2 is an rRNA methyltransferase required for 27S rRNA processing and 60S ribosome biogenesis [19, 20]. While largely uncharacterized, Syh1 co-purifies with ribosomes [21], suggesting that it too functions in translation or ribosome assembly. *SYH1* also displays genetic interaction with *EBP2*, encoding a protein involved in 60S biogenesis [22]. The identification of Nop2 and Syh1 are consistent with our previous observation that *vtc4Δ* cells show defects in polysome formation and the previous identification of negative genetic interactions between *vtc4Δ* mutants and

deletions of genes impacting ribosome biogenesis (*RPPIA*, *MAK11*, and *RPC25*) and translation (*ELP3*, *ELP6*, and *MNR1*) [23, 24]. These data are also consistent with findings in other eukaryotes. In particular, polyP localizes to the nucleolus, the site of ribosome biogenesis, and interacts with nucleolar proteins in trypanosomes [25]. Nucleolar polyP is also thought to regulate RNA polymerase I in myeloma cells [26]. Our expanded target list also included a number of proteins associated with vacuolar biology. Prb1 encodes the yeast vacuolar proteinase B [27]. Apl5 is involved in transporting protein cargo from the ER-golgi system to the vacuole [28]. Since the vast majority of polyP localizes to the vacuole in *S. cerevisiae*, these proteins are ideal candidate effectors of polyP-mediated signaling. Therefore, we carried out further experiments to validate the polyphosphorylation of these new targets and to determine amino acid sequences required for the modification.

We first sought to confirm that the electrophoretic shift detected for Prb1-GFP in the presence of *VTC4* was due to polyP. Since polyphosphorylation occurs non-enzymatically even in harsh conditions (7), we added synthetic polyP of 75 units in length to *vtc4Δ* whole-cell protein extracts generated via a trichloroacetic acid (TCA) lysis protocol. PolyP addition caused a concentration-dependent electrophoretic shift (**Figure 3A**). Addition of 5 mM polyP conferred an electrophoretic shift to Prb1-GFP in *vtc4Δ* extracts that was equal to the shift observed in the wild-type control. In contrast, the same concentration of sodium phosphate had no impact on the mobility of Prb1-GFP, confirming that polyP is required for the modification (**Figure 3A**). PolyP-induced shifts also scaled with chain length, with longer chains producing a more dramatic change in electrophoretic mobility (**Supporting Figure 2A**).

The Prb1 protease is a heavily processed protein that undergoes a series of glycosylations and programed cleavages to convert the zymogen precursor (pre-pro) form to the fully active

enzyme (mPrb1) [29]. Processing occurs in step with its transit through the ER-golgi system to the vacuole (**Figure 3B & C**). Since the C-terminal GFP tag of Prb1-GFP is predicted to be removed during its processing, **Figures 1A and 3A** only confirmed polyphosphorylation of pre-proPrb1. In order to study polyphosphorylation of Prb1 in the context of its processing from zymogen to active enzyme, we used a previously described galactose overexpression system [30]. Induction of *PRB1* transcription with the addition of galactose, followed by addition of glucose to turn off that transcription, allowed for the production of a population of native Prb1 whose processing could be monitored over time. Following analysis by NuPAGE and western blotting, we detected Prb1 with a previously published antibody that recognizes the first 14 amino acids of the fully processed and active (mPrb1) protein (**Figure 3B**) [29]. We expect this antibody to detect all forms of Prb1. Only pre-proPrb1, but not any of the processed forms, exhibited an electrophoretic shift in *VTC4* strains relative to *vtc4Δ* mutants (**Figure 3C**). As a control, the previously identified target Rts1 [9] showed polyphosphorylation throughout the time course in *VTC4* cells (**Supporting Figure 2B**). These data suggest that the P1 segment of Prb1, which is removed by the Pep4 protease in the first cleavage event within the endoplasmic reticulum [29], is the modified species. Indeed, the predicted PASK motif is located in the P1 fragment, as indicated in **Figure 3B**. Importantly, analysis of these same samples via traditional SDS-PAGE, which does resolve polyP-induced shifts [9], showed identical migration of all species, consistent with the electrophoretic shift being due to polyphosphorylation (**Supporting Figure 2C**). In this analysis, we also observed slightly delayed processing of Prb1 in *vtc4Δ* mutants, although it is unclear if this is biologically meaningful (**Supporting Figure 2C**).

Polyphosphorylation of the P1 fragment may be required to ensure early processing steps occur in a manner consistent with the production of an active mPrb1 protein. In this capacity,

polyP may function redundantly or in coordination with other PTMs, including glycosylations. Alternatively, polyP may function in a quality control capacity to regulate the function or degradation of Prb1 that is improperly processed by the ER-golgi system. A similar role has been suggested for the SCF<sup>Saf1</sup> ubiquitin ligase, which ubiquitylates Prb1 but does not impact the bulk turnover of the protein population [30, 31]. The hypothesis that polyP modulates protein stability is consistent with its previously described role as a molecular chaperone in other biological systems [32].

Prb1 is an interesting target in part because it emphasizes the importance of determining where within the cell polyphosphorylation occurs. While most polyP is localized to the yeast vacuole, it has also been detected in other compartments including the mitochondria, cytoplasm and nucleus [7, 33-35]. Importantly, the bioavailability of these pools of polyP to act in polyphosphorylation reactions *in vivo* is not clear. To our knowledge, polyP localization to the ER lumen has not been well documented. But, a fraction of the polyP-synthesizing VTC complex was proposed to reside at the ER membrane [36].

Apl5, the second vacuole-related protein uncovered in our screen, functions as a member of the conserved AP3 complex. AP3 selectively transports protein cargo from the Golgi to lysosome-related organelles such as the yeast vacuole [37, 38]. As with Prb1-GFP, Apl5-GFP polyphosphorylation was rescued by the addition of increasing concentrations of polyP to *vtc4Δ* extracts, and polyP-induced shifts scaled with chain length (**Figure 4A, Supporting Figure 2D**). Other subunits of AP3 were not polyphosphorylated (**Figure 4B**), suggesting that Apl5 may be a focal point for AP3 regulation by polyP. As predicted, the PASK motif of Apl5 is required for the electrophoretic shift observed in *VTC4* strains (**Figure 4C**). This PASK motif is located in the ‘ear domain’ of the protein (**Figure 4D**), previously demonstrated to be required for

interaction with AP3 regulators such as Vps41 [28, 39]. This interaction is thought to occur when Vps41 is integrated into the HOPS complex and promotes AP3 docking to the vacuole membrane, which allows proper delivery of vacuolar cargo [28]. The other large subunit of the AP3 complex, Apl6, also has a PASK motif [9], although we did not detect reproducible Vtc4-dependent electrophoretic shifts of this protein on NuPAGE gels (**Figure 4B**). Notably, Apl6 only has 2 lysines in its PASK motif, compared to 13 for Apl5 (**Supporting Figure 3A**). Since we previously found that electrophoretic shifts due to polyphosphorylation scale in proportion to the number of lysines in the PASK motif [9], it is possible that Apl6 polyphosphorylation is not easily detected via this method.

AP3 mutant strains were previously described as having low levels of polyP [40]. AP3 could impact polyP synthesis by transporting proteins involved in polyP synthesis or storage to the vacuole [40-42]. In the context of this model, polyphosphorylation of AP3 may serve as means of feedback to regulate AP3 function. Importantly, the impact of AP3 on polyP metabolism could be mediated by multiple cargos, as over 200 genes are known to impact polyP synthesis in *S. cerevisiae* [40]. In humans, mutations in the AP3 $\beta$  and AP3 $\delta$  subunits of the AP3 complex, homologs of Apl6 and Apl5 respectively (**Figure 4D**) [37], give rise to Hermansky-Pudlak Syndrome (HPS) subtypes 2 and 10 [43-45]. HPS is a pleiotropic disease characterized by defects in the transport of proteins to lysosome-related organelles [46, 47]. Notably, a hallmark of HPS is bleeding diathesis and a failure to accumulate or retain polyP in the dense granules of platelets [46, 47]. PolyP has a well-characterized role in the blood coagulation cascade and works by stimulating activation of several clotting factors [48]. AP3 $\beta$ 1, AP3 $\beta$ 2, and AP3 $\delta$  also have PASK motifs as defined by our criteria (**Supporting Figure 3B**), and Azevedo *et al.* provided evidence that AP3 $\beta$ 1 can be polyphosphorylated [13]. Direct regulation by polyP

may be a conserved feature of AP3 biology. As with Prb1, where within the transit pathway to the vacuole AP3 subunits interact with polyP is a critical question that remains to be answered.

Altogether, our work expands the scope of polyphosphorylation in yeast and provides new avenues for exploring the functional consequences of this intriguing post-translational modification. Expanding the catalog of polyphosphorylated proteins in other eukaryotes will be a critical step in understanding the molecular and cellular functions of polyP in these systems.

## **METHODS:**

### ***Yeast strains:***

All strains are in the S288C BY474 background and were generated using standard methods. Strains were analyzed via PCR in a manner similar to that described by the yeast deletion consortium ([http://www-sequence.stanford.edu/group/yeast\\_deletion\\_project/protocols.html](http://www-sequence.stanford.edu/group/yeast_deletion_project/protocols.html)) to confirm the presence of the knockout cassette and the absence of the wild-type open reading frame for gene deletions and the correct position of the tag-marker cassette for epitope-tagged strains. This analysis was also done for strains streaked or generated from strains taken from the GFP-tagged set. Here, a common forward primer was used to check the position of GFP-*HIS3MX* cassette with a gene-specific reverse primer outside of the area of homology used for recombination at the 3' end of the gene (typically 300-500 bp downstream of the stop codon). The common forward primer P1 (also known in our lab as KandCV) has the sequence 5'-TTCGCCTCGACATCATCTGCCC-3' and primes in the common *TEF* terminator of the 'MX' style cassettes. Thus, this primer is useful in confirming cassette positions associated with other yeast collections including the TAP-tagged and deletion libraries. A sample PCR analysis is shown in **Supporting Figure 4**. Strain confirmations were always done on colony-purified isolates, whose genotypes are described in **Supporting Table 1**. For the GAL shut-off

experiment used to examine Prb1 processing, wild-type *GALpr-PRB1* and *GALpr-PRB1 vtc4Δ* mutant strains were grown in synthetic complete (SC) media with 2 % raffinose overnight. Cells were diluted to OD600 = 0.3 in SC media with 2 % raffinose and grown until OD600 = 0.6. Cultures were then supplemented with 2 % galactose for 30 minutes to induce Prb1 expression. Subsequently, glucose was added to a final concentration of 2 % and time points were taken every 15 minutes. For all other experiments, cells were grown in YPD media supplemented with 0.005 % adenine and tryptophan. All strains were grown at 30 °C.

### ***Screening protocol:***

Candidate target strains were recovered from the yeast GFP-tagged collection and the *vtc4Δ* and *ppn1Δ* mutations were crossed into the strains as previously described [9]. Paired protein extracts were generated and analyzed using NuPAGE analysis following preparation of protein extracts via TCA lysis (see below). Rts1 was used as a control polyphosphorylated protein for each sample analyzed. Candidates were confirmed in a secondary screen before streaking strains for single colonies and confirming the correct position of the GFP tag. As described throughout the results section, select hits were reconfirmed by re-tagging candidates in wild-type and *vtc4Δ* strains and/or with the use of antibodies directed against native targets. A list of screened targets and their predicted PASK motifs is included in **Supporting Table 1**. We have now analyzed 321 of 427 PASK containing proteins in yeast.

### ***Protein analysis:***

Protein extraction was done using a TCA lysis method that has been described previously [9]. A similar protocol is reiterated here. Briefly, 3-6 OD600 equivalents of yeast cells were lysed in 300 μL of 20 % TCA with 100 μL of acid-washed glass beads. Supernatant was recovered and beads were washed with 300 μL of 5 % TCA and combined with the first supernatant. Samples

were centrifuged at 16,000 x g for 4 minutes at 4 °C. Pellets were resuspended in 100 µL SDS-PAGE sample buffer (0.8 mL 3X SDS PAGE sample buffer, 100 µL 1.5 M Tris-HCl pH 8.8, 100 µL 1 M DTT). Samples were boiled for 5 minutes and centrifuged again at 16,000 x g for 4 minutes. Supernatant was removed for immediate analysis or stored at -80 °C until use. Typically, 10 µL of extract (~ 75 µg) was loaded for each lane, but this varied depending on the expression of the protein under analysis. We have observed that protein samples tend to lose their polyphosphorylation after multiple freeze thaw cycles. We recommend same-day NuPAGE analysis of extracted proteins.

#### ***Western blotting:***

Buffers used for NuPAGE and SDS-PAGE analysis were described previously [9]. SDS-PAGE gels used for this work were 10 % final concentration made with 30 % acrylamide/bis solution at a ratio of 37.5:1 (BioRad 1610158). Please note that SDS-PAGE analysis does not resolve polyP-induced shifts. PVDF membrane (Biorad 162-0177) was used for Western blotting of separated protein samples. Primary and secondary antibodies used for immunoblotting, including dilution information for each antibody, is described in **Supporting Table 2**. Washed blots were exposed to ECL from Millipore (Sigma WBKLS0500 or WBLUF0500). Ponceau S stain (Sigma P-3504) was used to verify equal loading across the blots and to monitor the quality of transfer for each blot.

#### ***Homologs and Network analysis:***

Homologs were determined via the Yeastmine tool [49]. Genetic networks were generated using Genemania (genemania.org; June 12, 2019) [50]. Gene attributes were set to zero, only genetic and physical interactions were computed and shown, all other settings were left as default. FDR displayed was as calculated for nucleolar localization by the Genemania tool.

***In vitro polyphosphorylation assays:***

*In vitro* polyphosphorylation assays were carried out by mixing the indicated concentrations of polyP with TCA-style protein preps, followed by incubation at room temperature for 20 minutes before re-boiling of reactions and NuPAGE analysis, as described above. PolyP chains used for this analysis are an average of 75 units in length and were purchased from Kerafast (Medium chain, EUI005). For supporting *in vitro* analyses, short (14 units), medium (60 units), and long (130 units) chains were gifted by T. Shiba (Regentiss, Japan). Extra-long polyP chains (700 units) were from Kerafast (EUI002).

**ACKNOWLEDGEMENTS:**

We thank the members of the Downey lab for critical reading of the manuscript and reviewers for insightful comments. We thank Dr. Elizabeth Jones' lab for the anti-Prb1 antibody and T. Shiba for polyP standards. ABD was supported by an Ontario Graduate Scholarship. This work was funded by a Canadian Institutes of Health Research Project Grant to MD (PJT-148722). We also acknowledge funding from a Rare Disease Foundation Microgrant (grant number 1937).

**CONFLICTS OF INTEREST:**

The authors declare no conflicts of interest.

## FIGURES & LEGENDS:

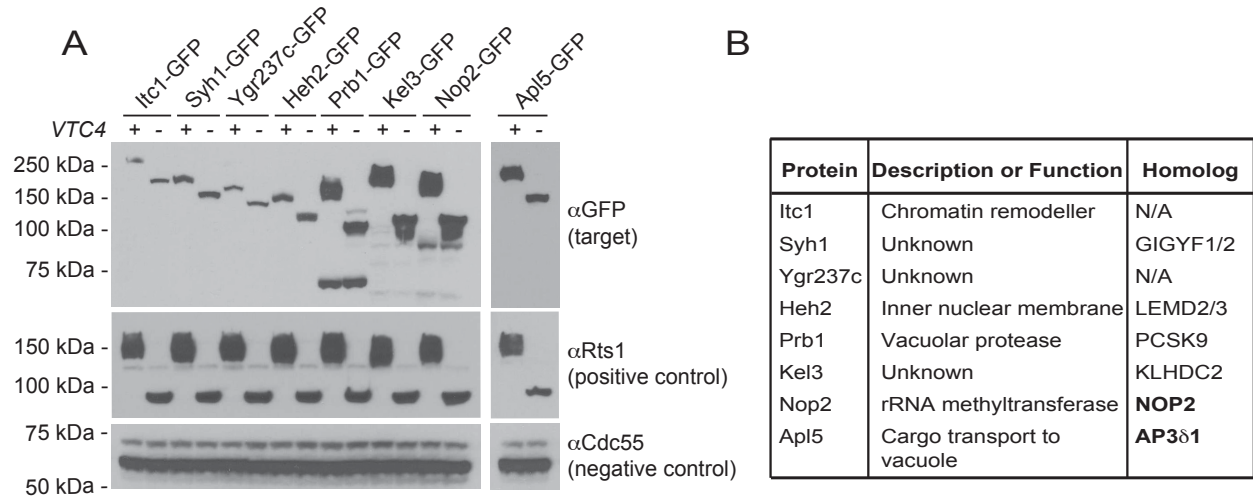

**Figure 1 - Identification of new polyphosphorylated targets in yeast. A)** NuPAGE analysis of polyphosphorylated proteins. Paired GFP-tagged proteins were extracted from wild-type or *vtc4Δ* mutant cells using TCA lysis prior to NuPAGE analysis, western blotting to PVDF membrane and detection using the indicated antibodies. Rts1 serves as a positive control. Cdc55 serves as a negative control. Images representative of N=4 or greater for each target. **B)** Table of new polyphosphorylated targets uncovered in this study. Human homologs were determined using the Yeastmine tool. Bold indicates presence of a PASK sequence in human homolog (as defined by Bentley-DeSousa *et al.* 2018).

Network of polyphosphorylated proteins in yeast

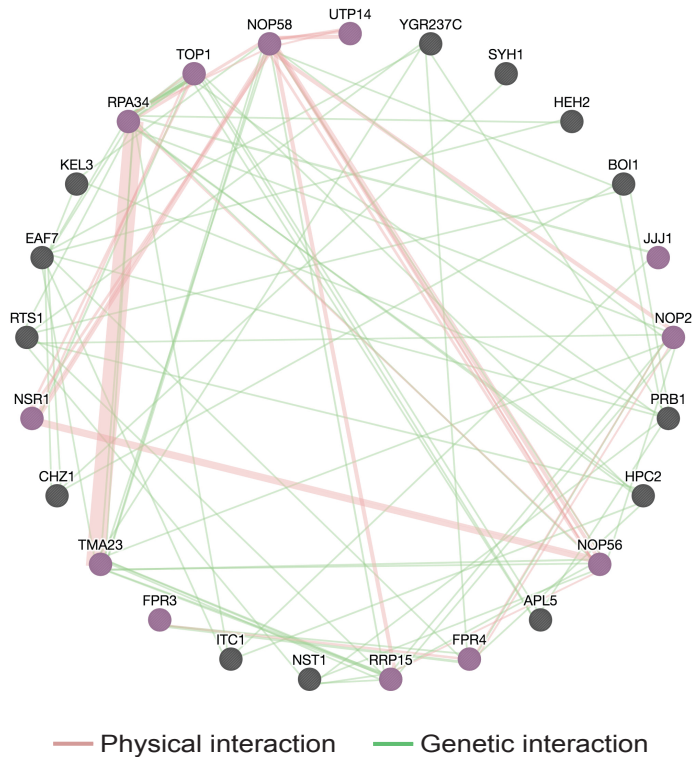

**Figure 2 - Polyphosphorylated targets are connected by genetic and physical interactions.** Genetic and physical associations between new and previously identified targets were computed using the Genemania tool (see Materials and Methods). Each node (circle) represents an individual polyphosphorylated protein ( $n = 22$ ). Physical and genetic interactions are indicated with green and pink lines respectively. Purple nodes indicate localization to the nucleolus ( $n = 12$ ;  $FDR = 1.85 \times 10^{-7}$ ).

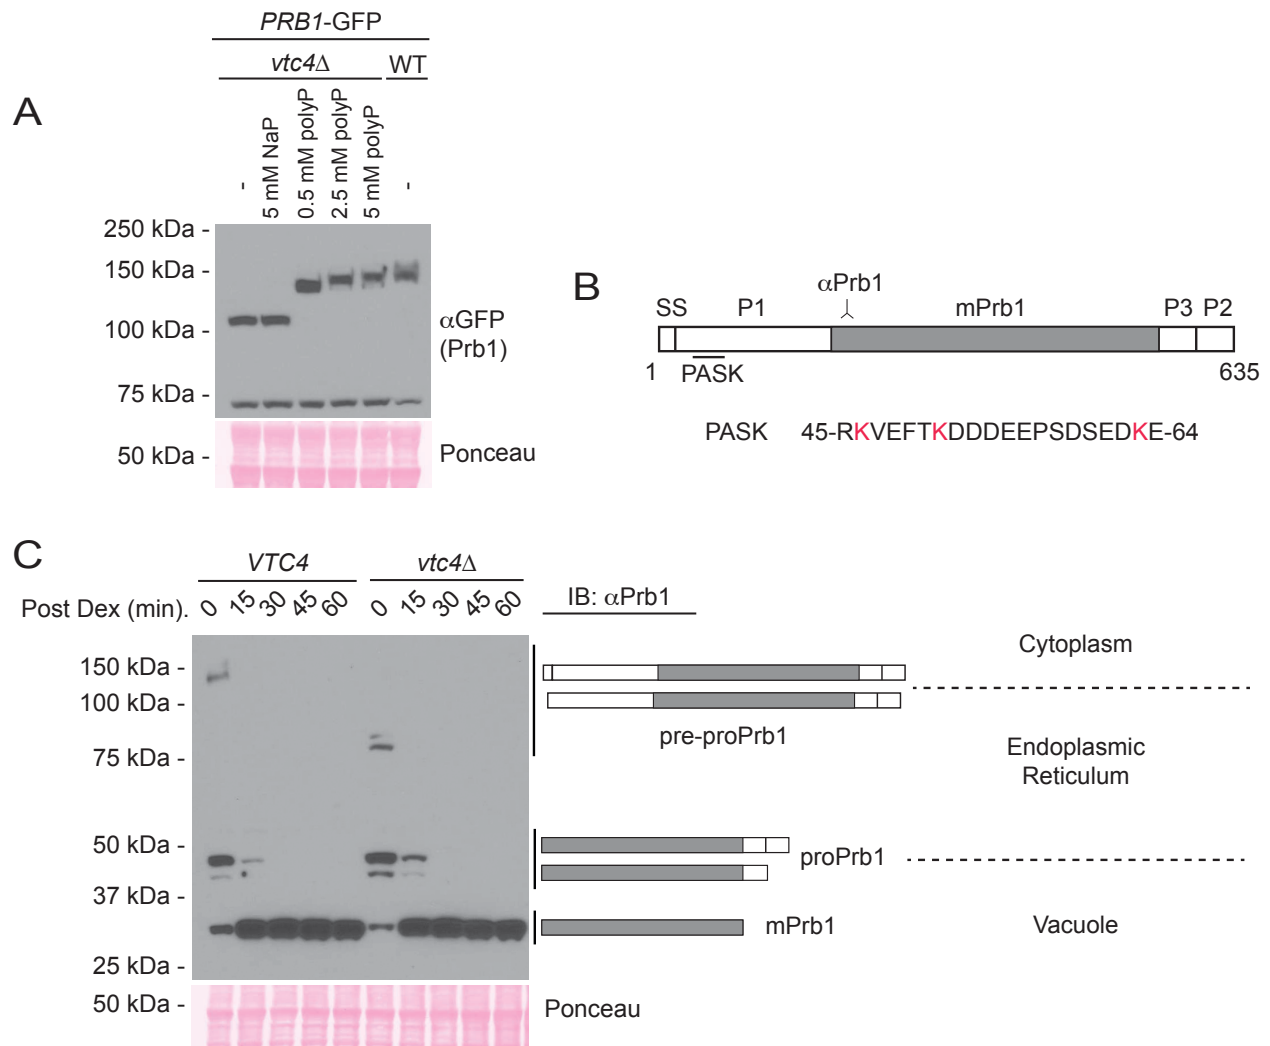

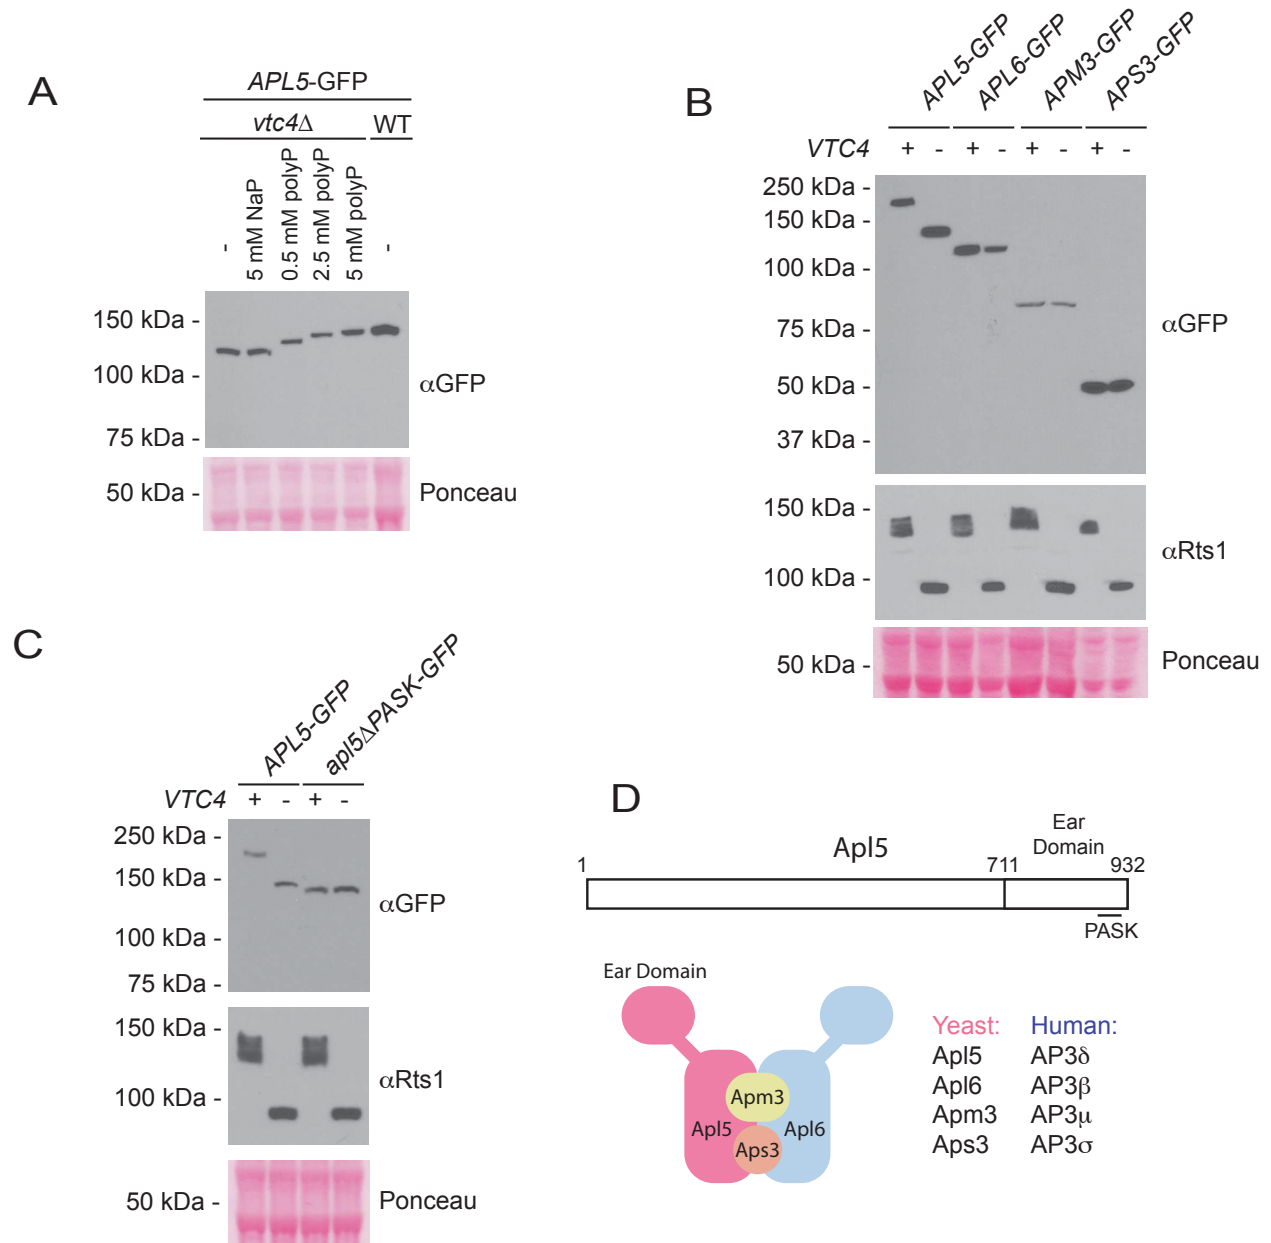

**Figure 4 - Analysis of Apl5 polyphosphorylation.** **A)** Indicated concentrations of polyP (75 units) or sodium phosphate control were added to *vtc4Δ* mutant cell extracts expressing GFP-tagged Apl5 and polyP-induced shifts were analyzed by western blotting with an antibody against GFP after NuPAGE analysis. Representative of N=3. **B)** The indicated components of the AP3 complex were expressed as GFP fusions in WT and *vtc4Δ* strains and analyzed by western blotting following NuPAGE analysis of protein extracts. Representative of N=3. **C)** The PASK motif of Apl5 is required for its polyphosphorylation. Protein extracts from the indicated strains were analyzed as described in B. Representative of N=3. **D)** Representation of the conserved Apl5 protein and the AP3 complex. The schematic of the AP3 complex is adapted from that proposed previously [37].

**SUPPORTING TABLES: (Provided in a single excel sheet):**

**Supporting Table 1** - PASK containing proteins screened for polyphosphorylation in this study.

**Supporting Table 2** - Yeast strains used in this study.

**Supporting Table 3** - Antibodies used in this study.

## REFERENCES:

1. Auesukaree, C., Homma, T., Tochio, H., Shirakawa, M., Kaneko, Y. & Harashima, S. (2004) Intracellular phosphate serves as a signal for the regulation of the PHO pathway in *Saccharomyces cerevisiae*, *J Biol Chem.* **279**, 17289-94.
2. Kornberg, A., Rao, N. N. & Ault-Riche, D. (1999) Inorganic polyphosphate: a molecule of many functions, *Annu Rev Biochem.* **68**, 89-125.
3. Gerasimaite, R., Sharma, S., Desfougeres, Y., Schmidt, A. & Mayer, A. (2014) Coupled synthesis and translocation restrains polyphosphate to acidocalcisome-like vacuoles and prevents its toxicity, *J Cell Sci.* **127**, 5093-104.
4. Gerasimaite, R. & Mayer, A. (2017) Ppn2, a novel Zn(2+)-dependent polyphosphatase in the acidocalcisome-like yeast vacuole, *J Cell Sci.* **130**, 1625-1636.
5. Eskes, E., Deprez, M. A., Wilms, T. & Winderickx, J. (2018) pH homeostasis in yeast; the phosphate perspective, *Curr Genet.* **64**, 155-161.
6. Rosenfeld, L., Reddi, A. R., Leung, E., Aranda, K., Jensen, L. T. & Culotta, V. C. (2010) The effect of phosphate accumulation on metal ion homeostasis in *Saccharomyces cerevisiae*, *J Biol Inorg Chem.* **15**, 1051-62.
7. Azevedo, C., Livermore, T. & Saiardi, A. (2015) Protein polyphosphorylation of lysine residues by inorganic polyphosphate, *Mol Cell.* **58**, 71-82.
8. Azevedo, C. & Saiardi, A. (2015) Why always lysine? The ongoing tale of one of the most modified amino acids, *Adv Biol Regul.*
9. Bentley-DeSousa, A., Holinier, C., Moteshareie, H., Tseng, Y. C., Kajjo, S., Nwosu, C., Amodeo, G. F., Bondy-Chorney, E., Sai, Y., Rudner, A., Golshani, A., Davey, N. E. & Downey, M. (2018) A Screen for Candidate Targets of Lysine Polyphosphorylation Uncovers a Conserved Network Implicated in Ribosome Biogenesis, *Cell Rep.* **22**, 3427-3439.
10. Azevedo, C. & Saiardi, A. (2016) The new world of inorganic polyphosphates, *Biochem Soc Trans.* **44**, 13-7.
11. Zarin, T., Strome, B., Nguyen Ba, A. N., Alberti, S., Forman-Kay, J. D. & Moses, A. M. (2019) Proteome-wide signatures of function in highly diverged intrinsically disordered regions, *Elife.* **8**.
12. Hothorn, M., Neumann, H., Lenherr, E. D., Wehner, M., Rybin, V., Hassa, P. O., Uttenweiler, A., Reinhardt, M., Schmidt, A., Seiler, J., Ladurner, A. G., Herrmann, C., Scheffzek, K. & Mayer, A. (2009) Catalytic core of a membrane-associated eukaryotic polyphosphate polymerase, *Science.* **324**, 513-6.
13. Azevedo, C., Singh, J., Steck, N., Hofer, A., Ruiz, F. A., Singh, T., Jessen, H. J. & Saiardi, A. (2018) Screening a Protein Array with Synthetic Biotinylated Inorganic Polyphosphate To Define the Human PolyP-ome, *ACS Chem Biol.* **13**, 1958-1963.
14. Bentley-DeSousa, A. & Downey, M. (2018) From underlying chemistry to therapeutic potential: open questions in the new field of lysine polyphosphorylation, *Curr Genet.*
15. Huh, W. K., Falvo, J. V., Gerke, L. C., Carroll, A. S., Howson, R. W., Weissman, J. S. & O'Shea, E. K. (2003) Global analysis of protein localization in budding yeast, *Nature.* **425**, 686-91.
16. Webster, B. M., Colombi, P., Jager, J. & Lusk, C. P. (2014) Surveillance of nuclear pore complex assembly by ESCRT-III/Vps4, *Cell.* **159**, 388-401.
17. Cherry, J. M., Hong, E. L., Amundsen, C., Balakrishnan, R., Binkley, G., Chan, E. T., Christie, K. R., Costanzo, M. C., Dwight, S. S., Engel, S. R., Fisk, D. G., Hirschman, J. E., Hitz,

- B. C., Karra, K., Krieger, C. J., Miyasato, S. R., Nash, R. S., Park, J., Skrzypek, M. S., Simison, M., Weng, S. & Wong, E. D. (2012) Saccharomyces Genome Database: the genomics resource of budding yeast, *Nucleic Acids Res.* **40**, D700-5.
18. Sugiyama, M. & Nikawa, J. (2001) The Saccharomyces cerevisiae Isw2p-Itc1p complex represses INO1 expression and maintains cell morphology, *J Bacteriol.* **183**, 4985-93.
19. Hong, B., Brockenbrough, J. S., Wu, P. & Aris, J. P. (1997) Nop2p is required for pre-rRNA processing and 60S ribosome subunit synthesis in yeast, *Mol Cell Biol.* **17**, 378-88.
20. Sharma, S., Yang, J., Watzinger, P., Kotter, P. & Entian, K. D. (2013) Yeast Nop2 and Rcm1 methylate C2870 and C2278 of the 25S rRNA, respectively, *Nucleic Acids Res.* **41**, 9062-76.
21. Fleischer, T. C., Weaver, C. M., McAfee, K. J., Jennings, J. L. & Link, A. J. (2006) Systematic identification and functional screens of uncharacterized proteins associated with eukaryotic ribosomal complexes, *Genes Dev.* **20**, 1294-307.
22. Okano, A., Wan, K., Kanda, K., Yabuki, Y., Funato, K. & Mizuta, K. (2015) SMY2 and SYH1 suppress defects in ribosome biogenesis caused by ebp2 mutations, *Biosci Biotechnol Biochem.* **79**, 1481-3.
23. Chatr-Aryamontri, A., Oughtred, R., Boucher, L., Rust, J., Chang, C., Kolas, N. K., O'Donnell, L., Oster, S., Theesfeld, C., Sellam, A., Stark, C., Breitkreutz, B. J., Dolinski, K. & Tyers, M. (2017) The BioGRID interaction database: 2017 update, *Nucleic Acids Res.* **45**, D369-D379.
24. Costanzo, M., VanderSluis, B., Koch, E. N., Baryshnikova, A., Pons, C., Tan, G., Wang, W., Usaj, M., Hanchard, J., Lee, S. D., Pelechano, V., Styles, E. B., Billmann, M., van Leeuwen, J., van Dyk, N., Lin, Z. Y., Kuzmin, E., Nelson, J., Piotrowski, J. S., Srikumar, T., Bahr, S., Chen, Y., Deshpande, R., Kurat, C. F., Li, S. C., Li, Z., Usaj, M. M., Okada, H., Pascoe, N., San Luis, B. J., Sharifpoor, S., Shuteriqi, E., Simpkins, S. W., Snider, J., Suresh, H. G., Tan, Y., Zhu, H., Malod-Dognin, N., Janjic, V., Przulj, N., Troyanskaya, O. G., Stagljar, I., Xia, T., Ohya, Y., Gingras, A. C., Raught, B., Boutros, M., Steinmetz, L. M., Moore, C. L., Rosebrock, A. P., Caudy, A. A., Myers, C. L., Andrews, B. & Boone, C. (2016) A global genetic interaction network maps a wiring diagram of cellular function, *Science.* **353**.
25. Negreiros, R. S., Lander, N., Huang, G., Cordeiro, C. D., Smith, S. A., Morrissey, J. H. & Docampo, R. (2018) Inorganic polyphosphate interacts with nucleolar and glycosomal proteins in trypanosomatids, *Mol Microbiol.* **110**, 973-994.
26. Jimenez-Nunez, M. D., Moreno-Sanchez, D., Hernandez-Ruiz, L., Benitez-Rondan, A., Ramos-Amaya, A., Rodriguez-Bayona, B., Medina, F., Brieva, J. A. & Ruiz, F. A. (2012) Myeloma cells contain high levels of inorganic polyphosphate which is associated with nucleolar transcription, *Haematologica.* **97**, 1264-71.
27. Moehle, C. M., Aynardi, M. W., Kolodny, M. R., Park, F. J. & Jones, E. W. (1987) Protease B of Saccharomyces cerevisiae: isolation and regulation of the PRB1 structural gene, *Genetics.* **115**, 255-63.
28. Angers, C. G. & Merz, A. J. (2009) HOPS interacts with Apl5 at the vacuole membrane and is required for consumption of AP-3 transport vesicles, *Mol Biol Cell.* **20**, 4563-74.
29. Moehle, C. M., Dixon, C. K. & Jones, E. W. (1989) Processing pathway for protease B of Saccharomyces cerevisiae, *J Cell Biol.* **108**, 309-25.
30. Mark, K. G., Simonetta, M., Maiolica, A., Seller, C. A. & Toczyski, D. P. (2014) Ubiquitin ligase trapping identifies an SCF(Saf1) pathway targeting unprocessed vacuolar/lysosomal proteins, *Mol Cell.* **53**, 148-61.

31. Mark, K. G., Meza-Gutierrez, F., Johnson, J. R., Newton, B. W., Krogan, N. J. & Toczyski, D. P. (2015) Prb1 Protease Activity Is Required for Its Recognition by the F-Box Protein Saf1, *Biochemistry*. **54**, 4423-6.
32. Gray, M. J., Wholey, W. Y., Wagner, N. O., Cremers, C. M., Mueller-Schickert, A., Hock, N. T., Krieger, A. G., Smith, E. M., Bender, R. A., Bardwell, J. C. & Jakob, U. (2014) Polyphosphate is a primordial chaperone, *Mol Cell*. **53**, 689-99.
33. Breus, N. A., Ryazanova, L. P., Dmitriev, V. V., Kulakovskaya, T. V. & Kulaev, I. S. (2012) Accumulation of phosphate and polyphosphate by *Cryptococcus humicola* and *Saccharomyces cerevisiae* in the absence of nitrogen, *FEMS Yeast Res*. **12**, 617-24.
34. Saito, K., Ohtomo, R., Kuga-Uetake, Y., Aono, T. & Saito, M. (2005) Direct labeling of polyphosphate at the ultrastructural level in *Saccharomyces cerevisiae* by using the affinity of the polyphosphate binding domain of *Escherichia coli* exopolyphosphatase, *Appl Environ Microbiol*. **71**, 5692-701.
35. Pestov, N. A., Kulakovskaya, T. V. & Kulaev, I. S. (2004) Inorganic polyphosphate in mitochondria of *Saccharomyces cerevisiae* at phosphate limitation and phosphate excess, *FEMS Yeast Res*. **4**, 643-8.
36. Gerasimaite, R. & Mayer, A. (2016) Enzymes of yeast polyphosphate metabolism: structure, enzymology and biological roles, *Biochem Soc Trans*. **44**, 234-9.
37. Cowles, C. R., Odorizzi, G., Payne, G. S. & Emr, S. D. (1997) The AP-3 adaptor complex is essential for cargo-selective transport to the yeast vacuole, *Cell*. **91**, 109-18.
38. Odorizzi, G., Cowles, C. R. & Emr, S. D. (1998) The AP-3 complex: a coat of many colours, *Trends Cell Biol*. **8**, 282-8.
39. Rehling, P., Darsow, T., Katzmann, D. J. & Emr, S. D. (1999) Formation of AP-3 transport intermediates requires Vps41 function, *Nat Cell Biol*. **1**, 346-53.
40. Freimoser, F. M., Hurlimann, H. C., Jakob, C. A., Werner, T. P. & Amrhein, N. (2006) Systematic screening of polyphosphate (poly P) levels in yeast mutant cells reveals strong interdependence with primary metabolism, *Genome Biol*. **7**, R109.
41. Besteiro, S., Tonn, D., Tetley, L., Coombs, G. H. & Mottram, J. C. (2008) The AP3 adaptor is involved in the transport of membrane proteins to acidocalcisomes of *Leishmania*, *J Cell Sci*. **121**, 561-70.
42. Huang, G., Fang, J., Sant'Anna, C., Li, Z. H., Wellems, D. L., Rohloff, P. & Docampo, R. (2011) Adaptor protein-3 (AP-3) complex mediates the biogenesis of acidocalcisomes and is essential for growth and virulence of *Trypanosoma brucei*, *J Biol Chem*. **286**, 36619-30.
43. Wenham, M., Grieve, S., Cummins, M., Jones, M. L., Booth, S., Kilner, R., Ancliff, P. J., Griffiths, G. M. & Mumford, A. D. (2010) Two patients with Hermansky Pudlak syndrome type 2 and novel mutations in AP3B1, *Haematologica*. **95**, 333-7.
44. Mohammed, M., Al-Hashmi, N., Al-Rashdi, S., Al-Sukaiti, N., Al-Adawi, K., Al-Riyami, M. & Al-Maawali, A. (2018) Biallelic mutations in AP3D1 cause Hermansky-Pudlak syndrome type 10 associated with immunodeficiency and seizure disorder, *Eur J Med Genet*.
45. Ammann, S., Schulz, A., Krageloh-Mann, I., Dieckmann, N. M., Niethammer, K., Fuchs, S., Eckl, K. M., Plank, R., Werner, R., Altmüller, J., Thiele, H., Nurnberg, P., Bank, J., Strauss, A., von Bernuth, H., Zur Stadt, U., Grieve, S., Griffiths, G. M., Lehmborg, K., Hennies, H. C. & Ehl, S. (2016) Mutations in AP3D1 associated with immunodeficiency and seizures define a new type of Hermansky-Pudlak syndrome, *Blood*. **127**, 997-1006.
46. Huizing, M., Anikster, Y. & Gahl, W. A. (2000) Hermansky-Pudlak syndrome and related disorders of organelle formation, *Traffic*. **1**, 823-35.

47. Huizing, M., Boissy, R. E. & Gahl, W. A. (2002) Hermansky-Pudlak syndrome: vesicle formation from yeast to man, *Pigment Cell Res.* **15**, 405-19.
48. Travers, R. J., Smith, S. A. & Morrissey, J. H. (2015) Polyphosphate, platelets, and coagulation, *Int J Lab Hematol.* **37 Suppl 1**, 31-5.
49. Balakrishnan, R., Park, J., Karra, K., Hitz, B. C., Binkley, G., Hong, E. L., Sullivan, J., Micklem, G. & Cherry, J. M. (2012) YeastMine--an integrated data warehouse for *Saccharomyces cerevisiae* data as a multipurpose tool-kit, *Database (Oxford)*. **2012**, bar062.
50. Warde-Farley, D., Donaldson, S. L., Comes, O., Zuberi, K., Badrawi, R., Chao, P., Franz, M., Grouios, C., Kazi, F., Lopes, C. T., Maitland, A., Mostafavi, S., Montojo, J., Shao, Q., Wright, G., Bader, G. D. & Morris, Q. (2010) The GeneMANIA prediction server: biological network integration for gene prioritization and predicting gene function, *Nucleic Acids Res.* **38**, W214-20.
